# Supplementary material for: Three-Dimensional Vascularized Lung Cancer-on-a-Chip with Lung Extracellular Matrix Hydrogels for In Vitro Screening
Source: MDPI journal article supplement (doi:10.3390/cancers13163930), 2021-08-05
Supplement: s1 [file s1]

Article

## Supplementary File:

# Three-dimensional Vascularized Lung Cancer-on-a-chip with Lung Extracellular Matrix Hydrogels for *In Vitro* Screening

Sangun Park<sup>1,2,†</sup>, Tae Hee Kim<sup>1,†</sup>, Soo Hyun Kim<sup>1,3</sup>, Seungkwon You<sup>2,\*</sup>, Youngmee Jung<sup>1,4,\*</sup>

<sup>1</sup> Center for Biomaterials, Biomedical Research Institute, Korea Institute of Science and Technology (KIST), Seoul, Republic of Korea; 120025@kist.re.kr(S.P.); 213872@kist.re.kr(T.H.K.); soohkim@kist.re.kr(S.H.K); winnie97@kist.re.kr(Y.J.)

<sup>2</sup> Laboratory of Cell Function Regulation, Department of Biotechnology, College of Life Sciences and Biotechnology, Korea University, Seoul 136-701, Republic of Korea; 120025@kist.re.kr(S.P.); bioseung@korea.ac.kr(S.Y.)

<sup>3</sup> NBIT, KU-KIST Graduate School of Converging Science and Technology, Korea University, Seoul, 02841, Republic of Korea; soohkim@kist.re.kr(S.H.K)

<sup>4</sup> School of Electrical and Electronic Engineering, YU-KIST Institute, Yonsei University, Seoul, Republic of Korea; winnie97@kist.re.kr(Y.J.)

\* Correspondence: bioseung@korea.ac.kr(S.Y.); winnie97@kist.re.kr; Tel.: 82-2-958-5348(Y.J.)

† Equal contributions.

Supplementary Figure S1

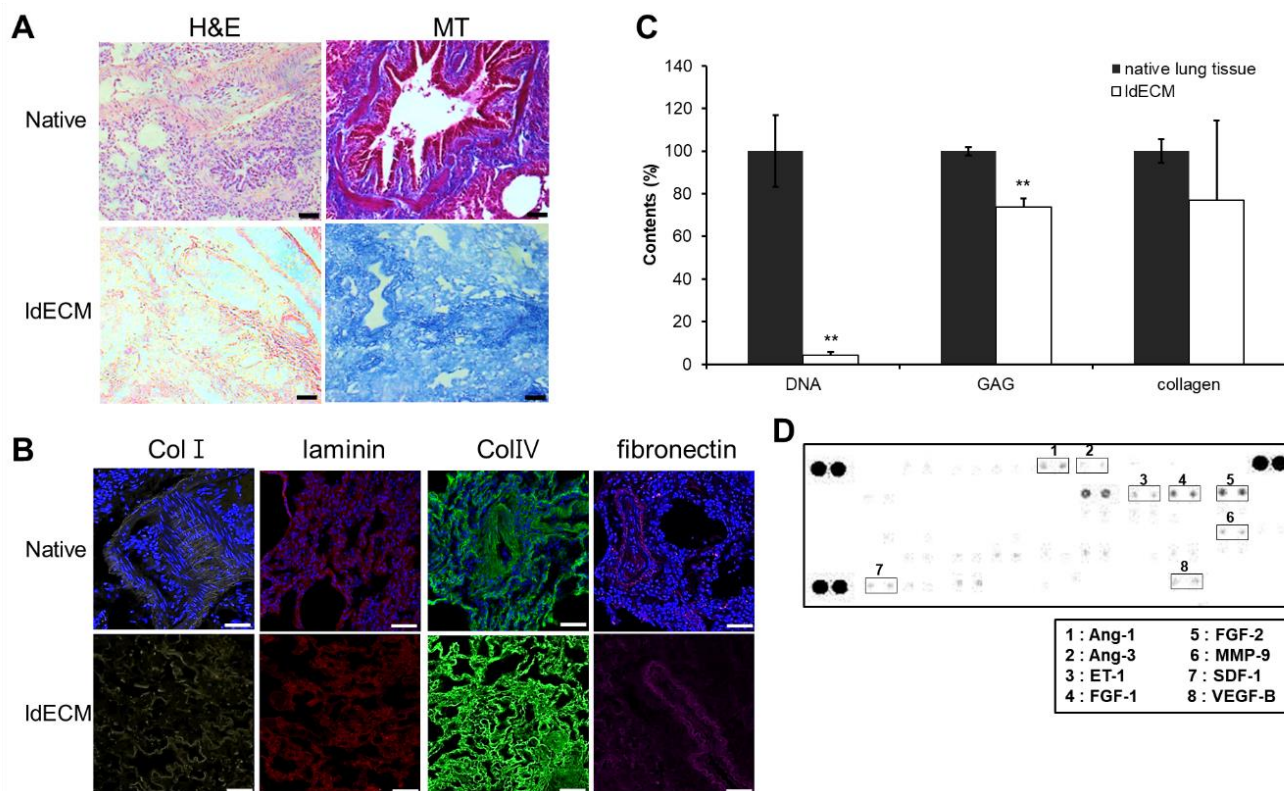

**Figure S1.** Component analysis of IdECM. (A) H&E and MT staining of native and IdECM. Scale bars: 100  $\mu$ m. (B) Immunofluorescence staining of the ECM components Col-I and IV, laminin, and fibronectin. Scale bars: 50  $\mu$ m. (C) Quantification of DNA contents and ECM components (GAGs and collagen) of native ECM and IdECM.  $**p < 0.01$ . (D) Analysis of pro-angiogenic factors present in the IdECM.

Supplementary Figure S2

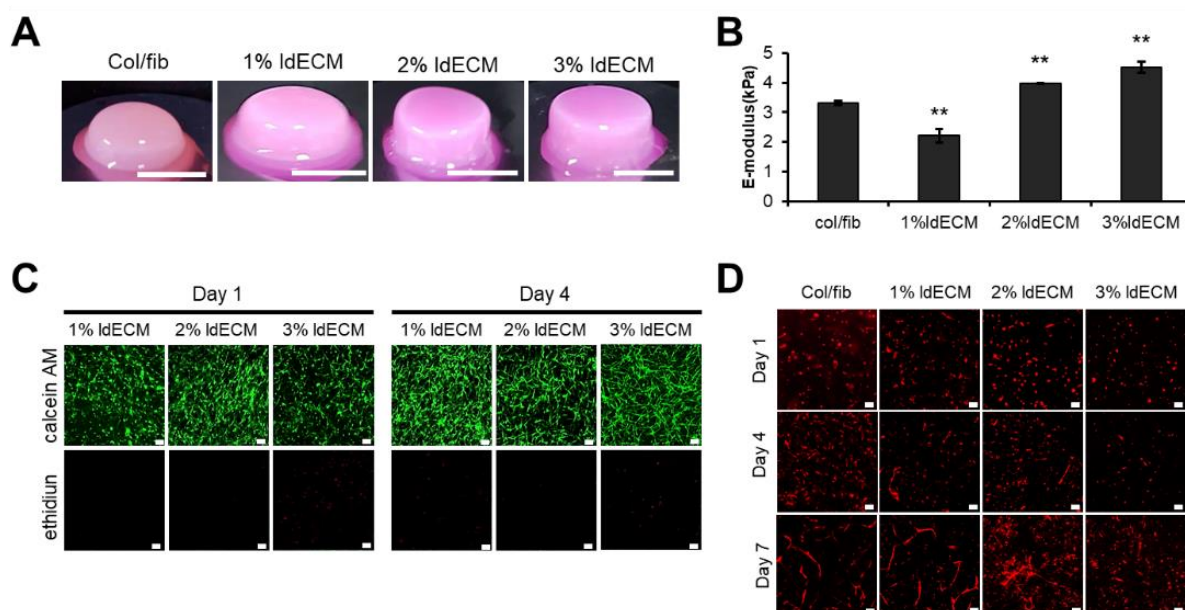

**Figure S2.** Characterization of various ldECM concentrations on matrix formation. (A) Images of 50/50 collagen/fibrin (col/fib) and ldECM matrices at different indicated concentrations. Scale bars: 10 mm. (B) Quantification of compressive E-modulus (Young's modulus, kPa) of ldECM matrices. \*\* $p < 0.01$  compared to the col/fib group. (C) Representative images of cell viability assay on days 1 and 4, and (D) vessel-like structures on days 1, 4, and 7 in ldECM matrices of different indicated concentrations. Scale bars: 50  $\mu\text{m}$ (C), 100 $\mu\text{m}$ (D).

## Supplementary Figure S3

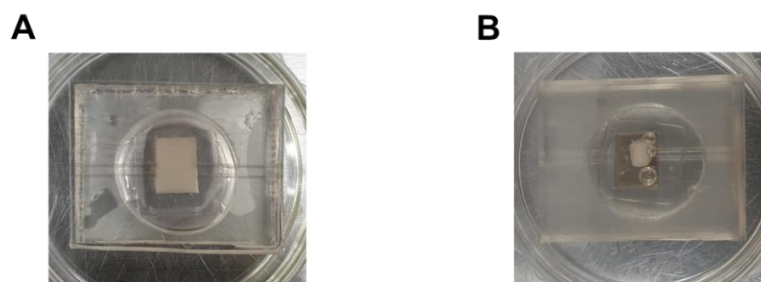

**Figure S3.** Developing the VLCC using tissue-mimetic hybrid hydrogel. (A) Collagen/fibrin hydrogel (3 mg/ml collagen, 3 mg/ml fibrin at ratio of 1:1). (B). Representative images of the hydrogel one day after gel loading.

Supplementary Figure S4

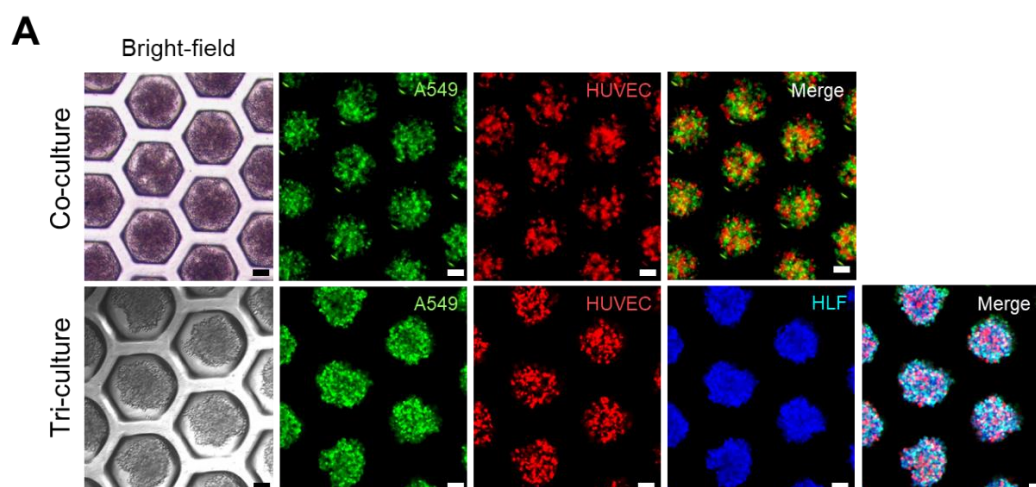

**Figure S4.** Optimization of tumor spheroid formation. (A) Representative bright-field and fluorescent images of bi-cellular and tri-cellular spheroids formed in the Stem fit micromolds one day after seeding. Scale bar: 100  $\mu$ m.
